# Supplementary material
Source: Springer Nature journal article supplement (https://www.springermedizin.de/resource/supplementary/12879_2008_860_MOESM1_ESM.pdf/9449942)

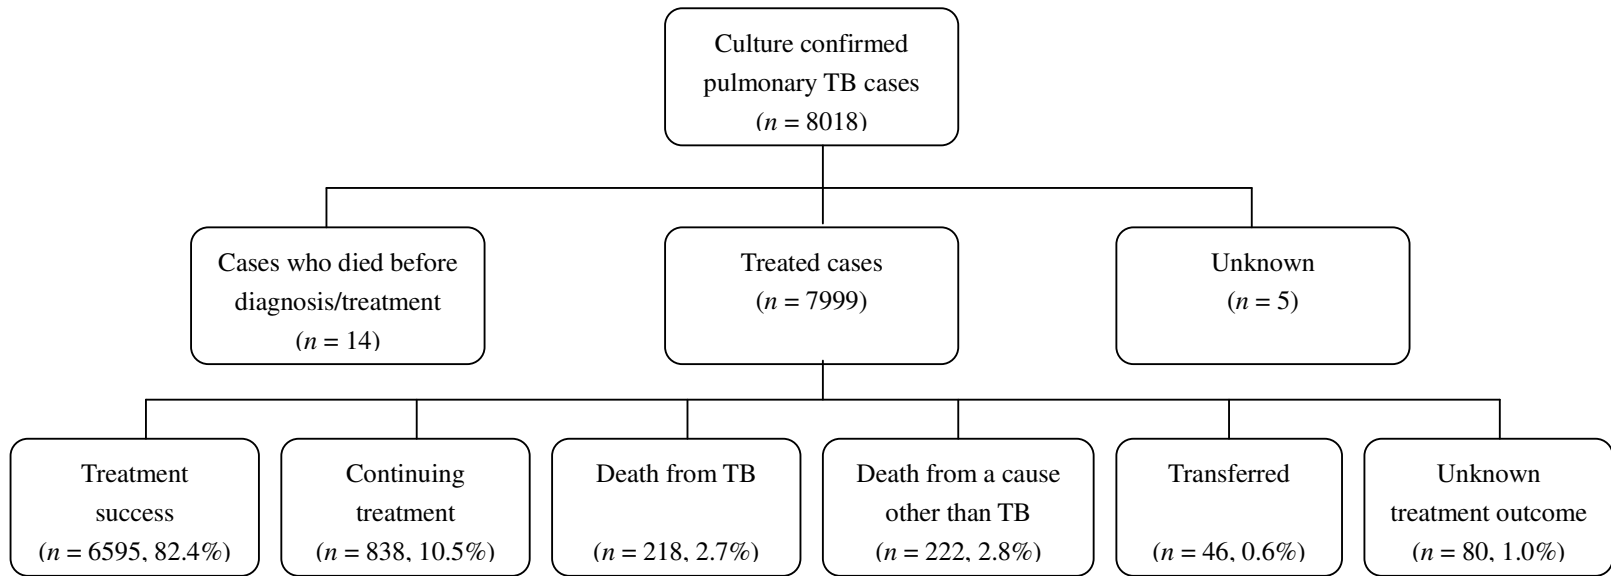

TB = tuberculosis

Supplement: MOESM1 [file 9449942]
